# Supplementary material
Source: PubMed Central journal article supplement (PMC2982792)
Supplement: NIHMS242386-supplement-1_si_001.pdf [file NIHMS242386-supplement-1_si_001.pdf]

**Supplemental Figure 1**

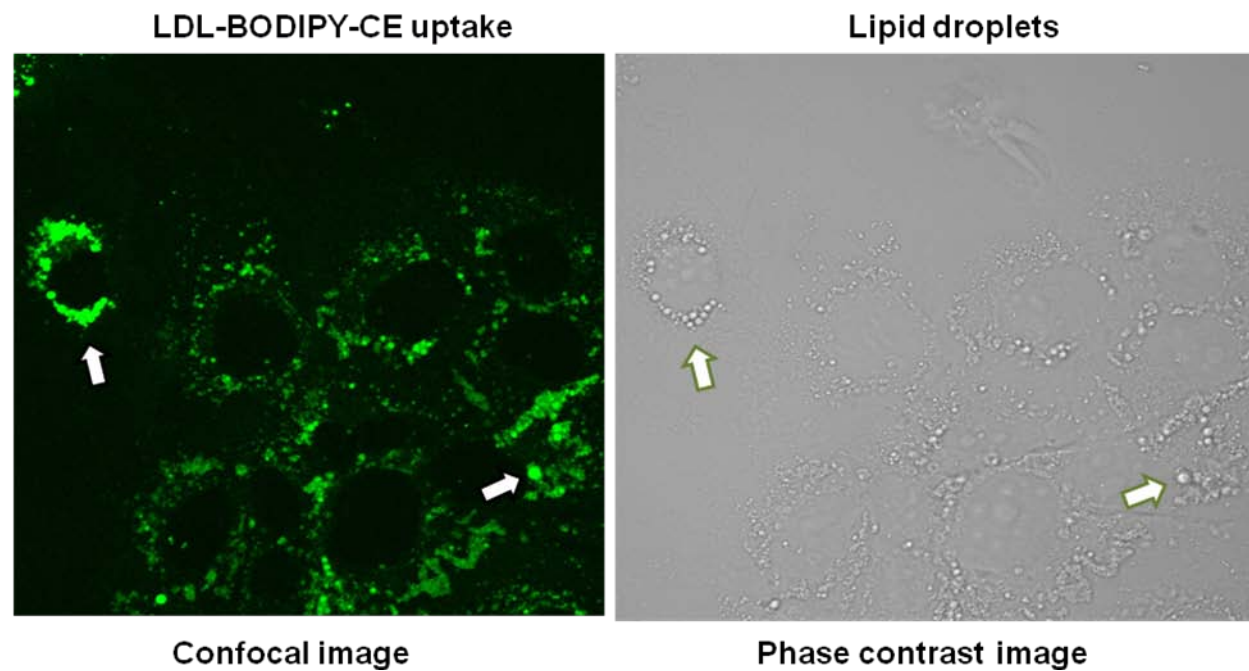

**Supplemental Figure 1.** Uptake of LDL-Bodipy-CE results in fluorescent label in phase dense lipid droplets of Huh7 cells. Left: Confocal fluorescence image. Right: Phase contrast image of the same field. Arrows point to phase dense lipid droplets. Uptake of HDL-Bodipy-CE and CERM-Bodipy-CE also show some co-localization with lipid droplets (data not shown).
